# Supplementary material for: In situpassivation of Pb0traps by fluoride acid-based ionic liquids enables enhanced emission and stability of CsPbBr3nanocrystals for efficient white light-emitting diodes
Source: Royal Society of Chemistry journal article supplement (doi:10.1039/d2nr03861g), 2022-01-01
Supplement: d2nr03861g1.pdf [file d2nr03861g1.pdf]

## Electronic Supplementary Information

### **In-situ passivation of Pb<sup>0</sup> traps by fluoride acid-based ionic liquid enables enhanced emission and stability of CsPbBr<sub>3</sub> nanocrystals for efficient white light-emitting diodes**

Yanqiao Xu,<sup>ab</sup> Xiaobo Hu,<sup>c</sup> Haijie Chen,<sup>\*c</sup> Huidong Tang,<sup>b</sup> Qing Hu,<sup>b</sup> Ting Chen,<sup>a</sup> Weihui Jiang,<sup>ab</sup>

Lianjun Wang<sup>\*c</sup> and Wan Jiang<sup>c</sup>

<sup>a</sup>*National Engineering Research Center for Domestic & Building Ceramics, Jingdezhen Ceramic University, Jingdezhen 333000, China*

<sup>b</sup>*School of Material Science and Engineering, Jingdezhen Ceramic University, Jingdezhen 333000, China*

<sup>c</sup>*State Key Laboratory for Modification of Chemical Fibers and Polymer Materials College of Materials Science and Engineering, Donghua University, Shanghai 201620, China*

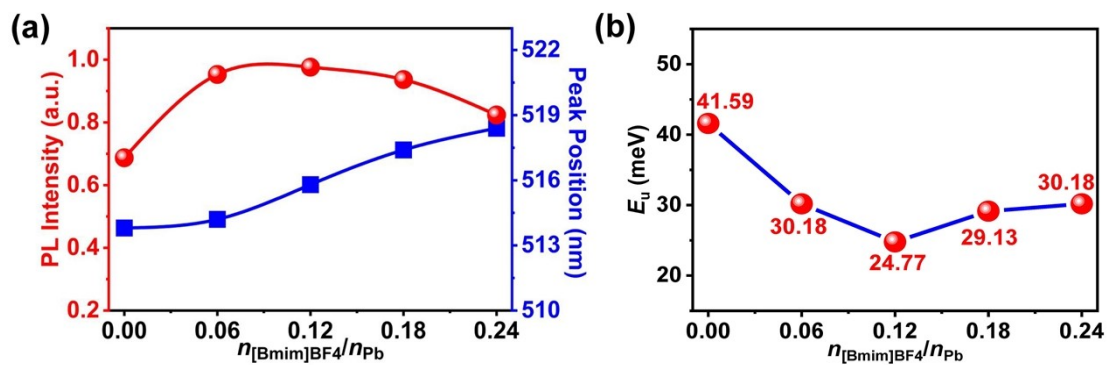

Fig. S1 (a) Evolution of PL intensity and peak positions and (b) calculated Urbach energy of CsPbBr<sub>3</sub> NCs with different  $n_{[Bmim]BF_4}/n_{Pb}$  ratios.

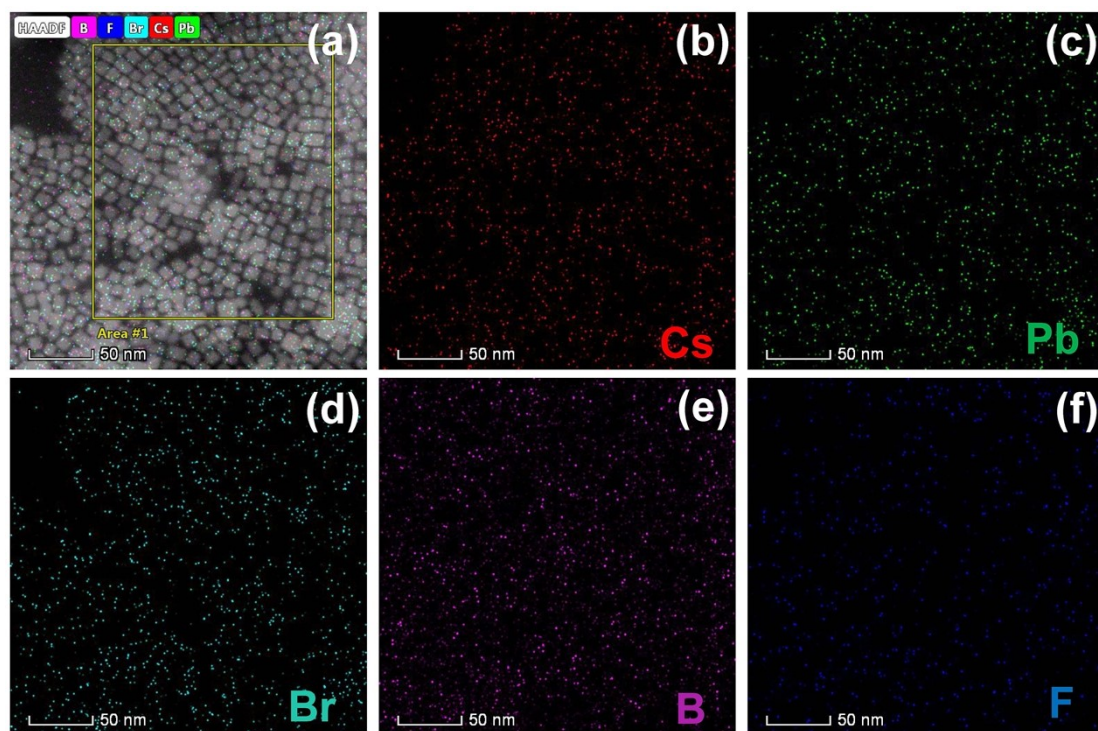

Fig. S2 (a) HAADF-STEM image, (b) Cs, (c) Pb, (d) Br, (e) B, and (f) F elemental maps of CsPbBr<sub>3</sub> NCs prepared with  $n_{[Bmim]BF_4}/n_{Pb}=0.12$ .

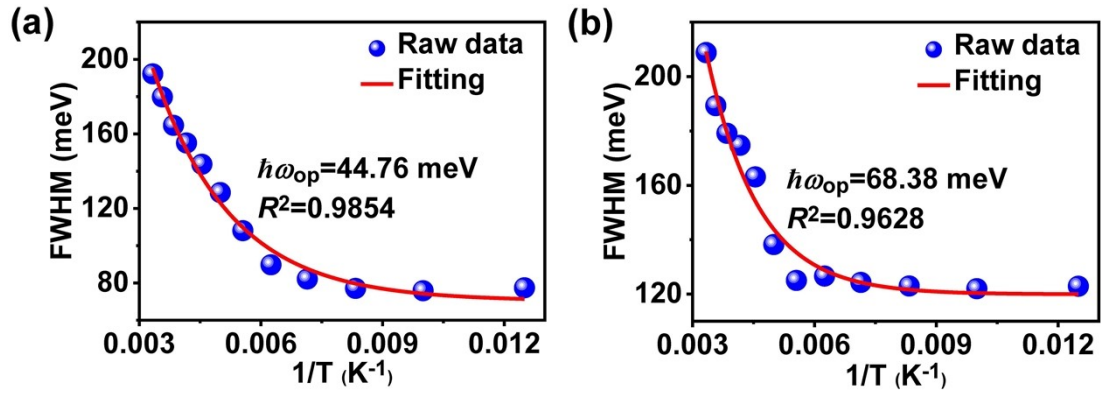

**Fig. S3** Plot of the FWHM of CsPbBr<sub>3</sub> NCs prepared (a) without and (b) with the assistance of [Bmim]BF<sub>4</sub> as a function of 1/T.

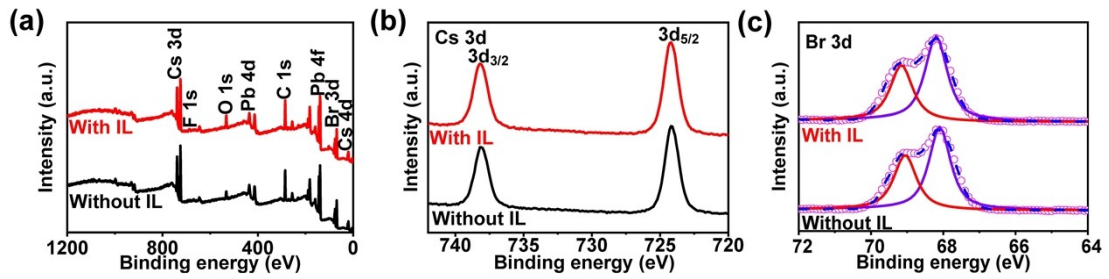

**Fig. S4** XPS (a) survey spectra, and (b) Cs 3d core-level, and (c) Br 3d core-level spectra of CsPbBr<sub>3</sub> NCs prepared with and without the assistance of [Bmim]BF<sub>4</sub>.

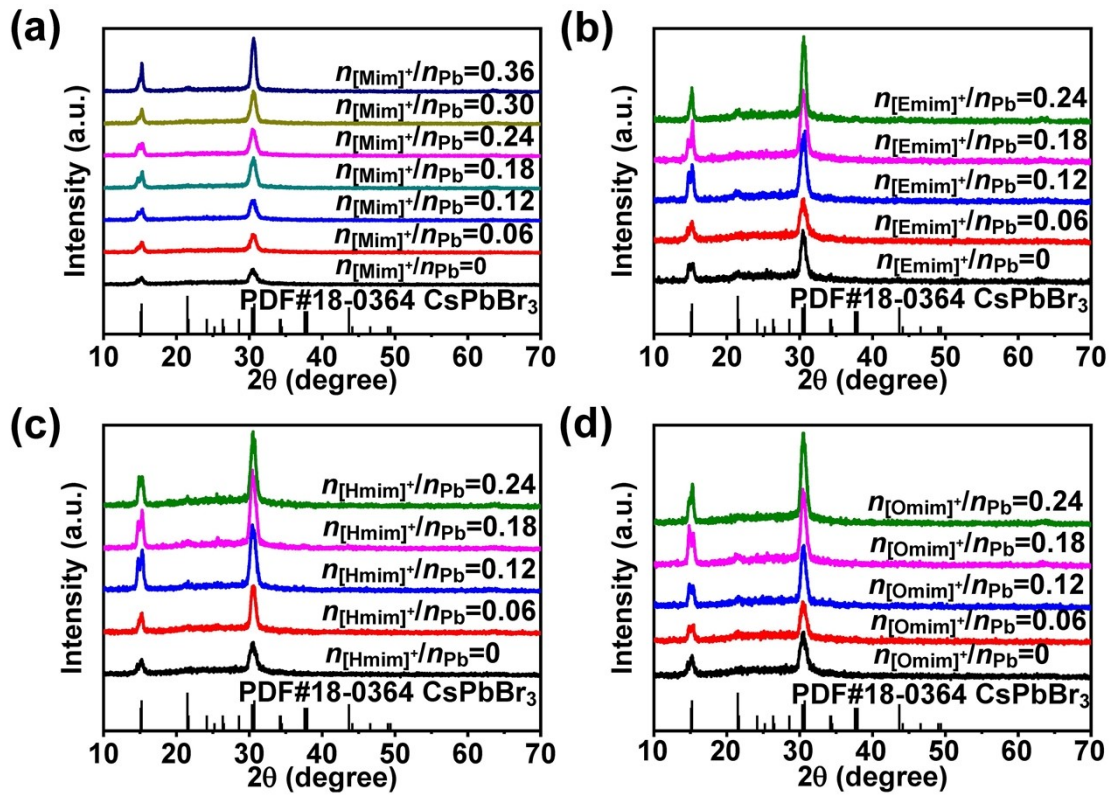

Fig. S5 XRD patterns of CsPbBr<sub>3</sub> NCs prepared with different chain length of ionic liquid: (a)

[Mim]BF<sub>4</sub>, (b) [Emim]BF<sub>4</sub>, (c) [Hmim]BF<sub>4</sub>, and (d) [Omim]BF<sub>4</sub>.

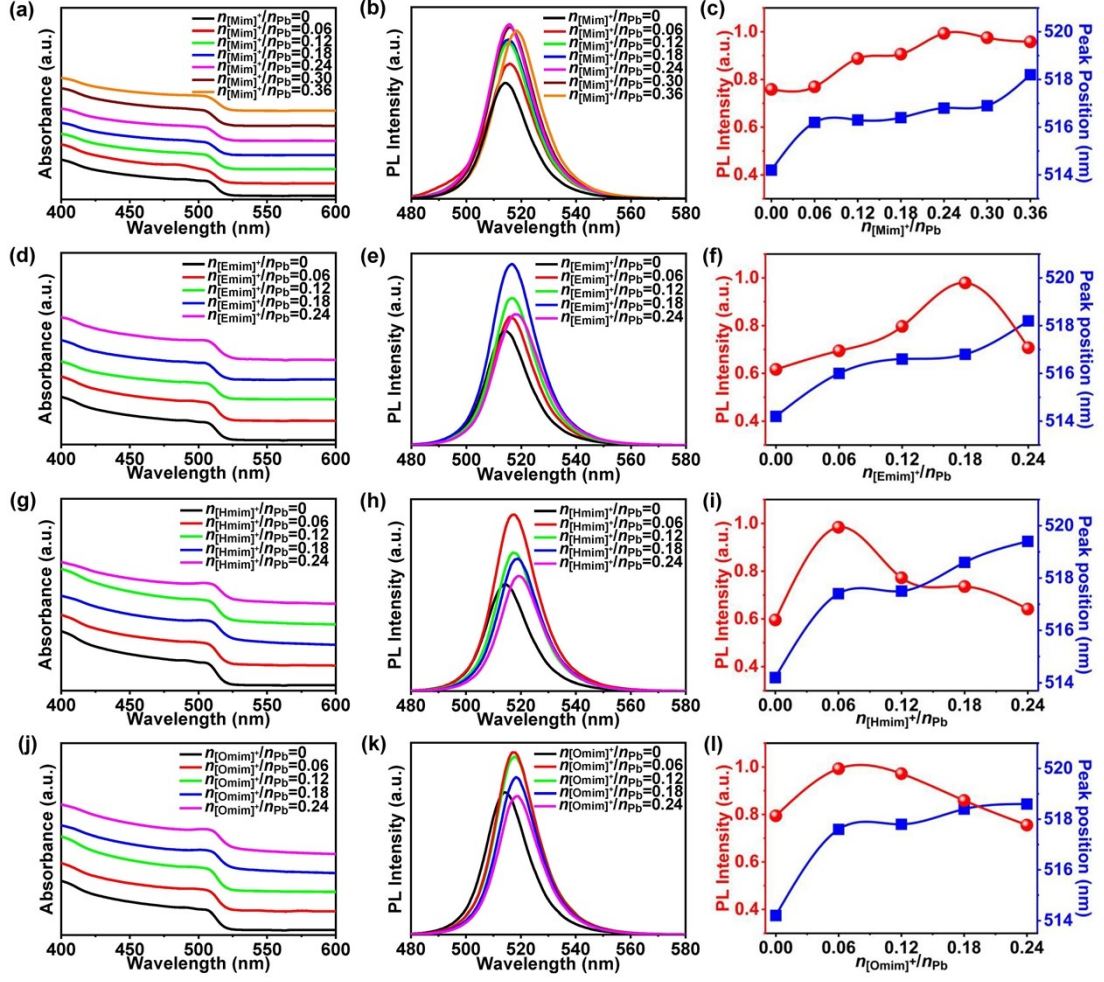

**Fig. S6** Absorption spectra, PL spectra, and evolution of PL intensity and peak positions in dependence with the values of the molar ratios of (a-c)  $n_{[Mim]}^+/n_{Pb}$ , (d-f)  $n_{[Emim]}^+/n_{Pb}$ , (g-i)  $n_{[Hmim]}^+/n_{Pb}$ , (j-l)  $n_{[Omim]}^+/n_{Pb}$ .



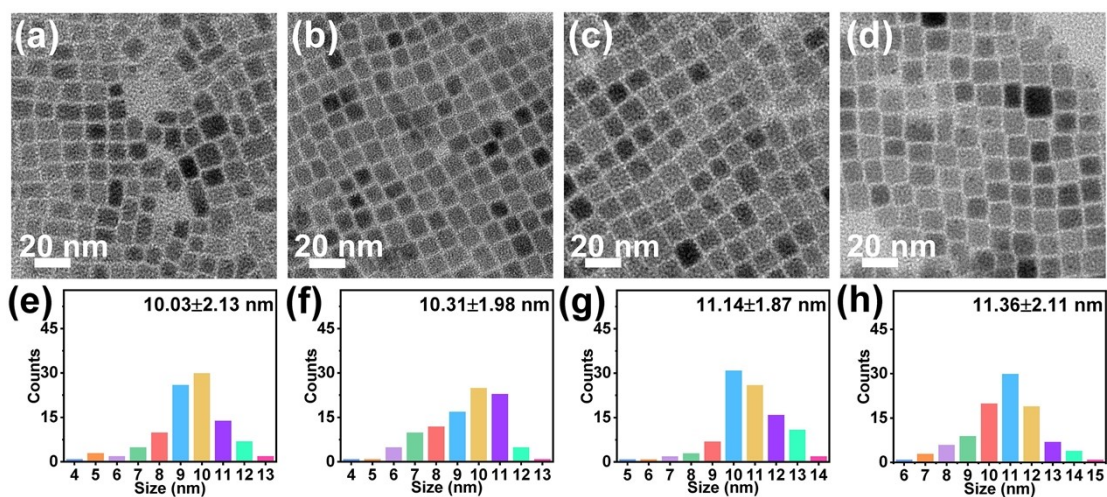

**Fig. S7** TEM images and size distribution histograms of CsPbBr<sub>3</sub> NCs prepared by using ionic liquid with different chain length: (a, e) [Mim]BF<sub>4</sub>, (b, f) [Emim]BF<sub>4</sub>, (c, g) [Hmim]BF<sub>4</sub>, and (d, h) [Omim]BF<sub>4</sub>.

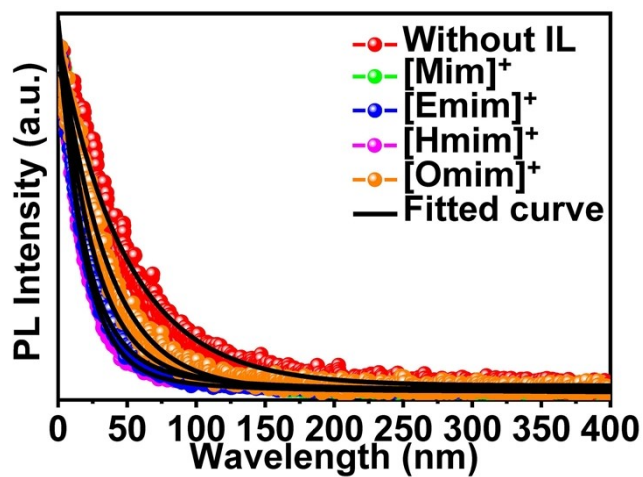

**Fig. S8** Decay curves of CsPbBr<sub>3</sub> NCs prepared by using ionic liquid with different chain length.

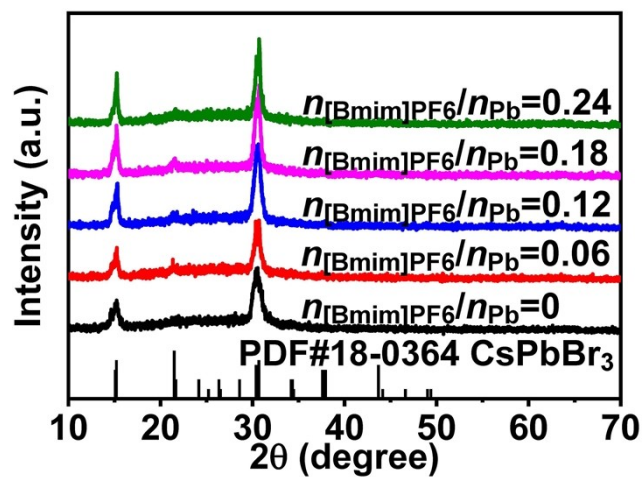

**Fig. S9** XRD patterns of CsPbBr<sub>3</sub> NCs prepared with different  $n_{[\text{Bmim}]\text{PF}_6}/n_{\text{Pb}}$  ratios of 0, 0.06, 0.12, 0.18, and 0.24.

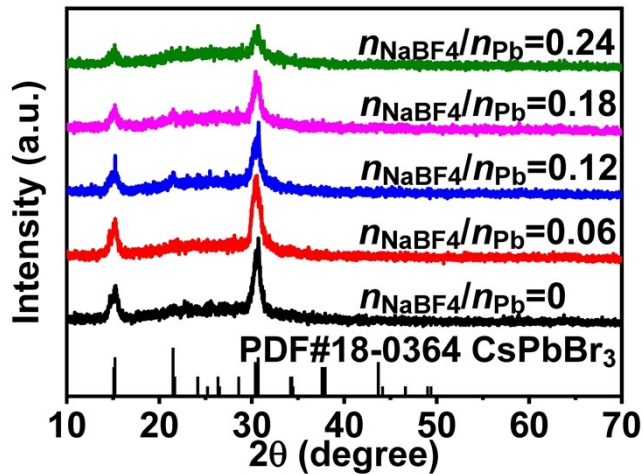

**Fig. S10** XRD patterns of CsPbBr<sub>3</sub> NCs prepared with different  $n_{\text{NaBF}_4}/n_{\text{Pb}}$  ratios of 0, 0.06, 0.12, 0.18, and 0.24.

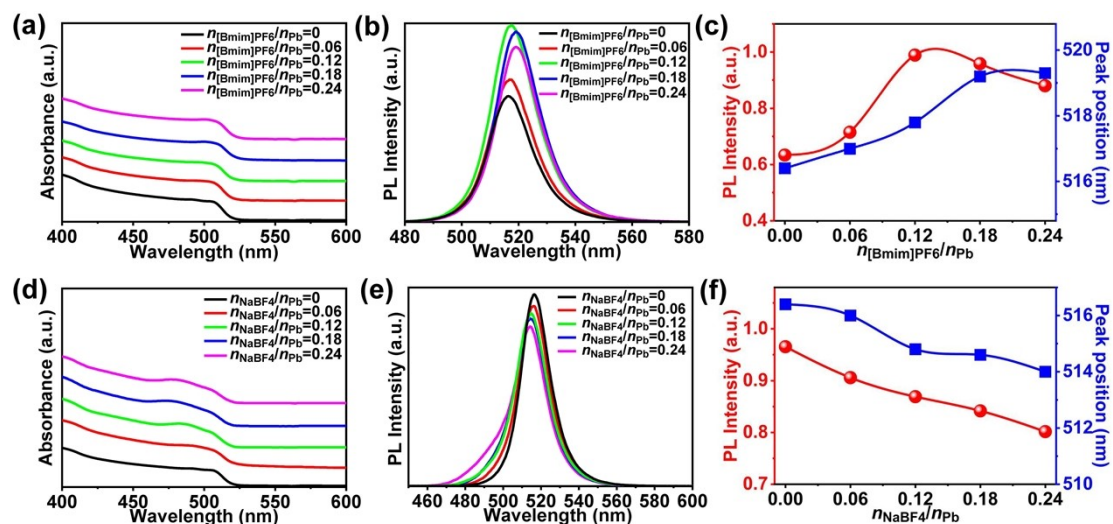

**Fig. S11** Absorption spectra, PL spectra, and evolution of PL intensity and peak positions in dependence with the values of the molar ratios of (a-c)  $n_{[\text{Bmim}]\text{PF}_6}/n_{\text{Pb}}$ , (d-f)  $n_{\text{NaBF}_4}/n_{\text{Pb}}$ .

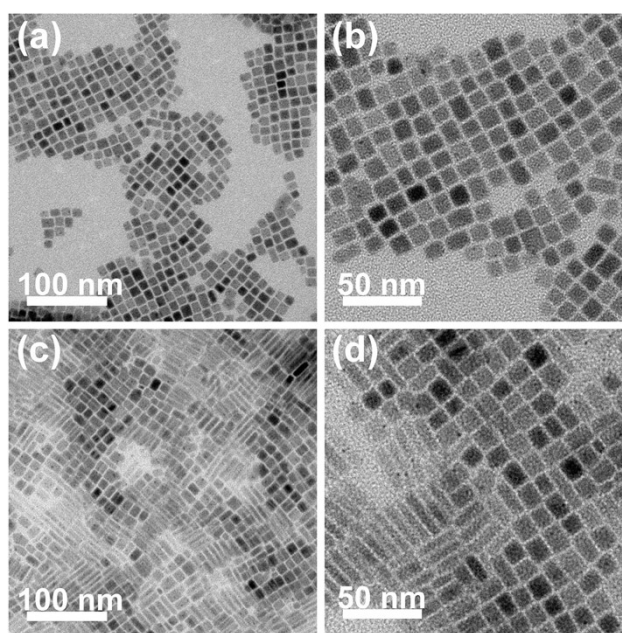

**Fig. S12** TEM images of CsPbBr<sub>3</sub> NCs prepared using (a, b) [Bmim]PF<sub>6</sub>, and (c, d) NaBF<sub>4</sub> as additives.



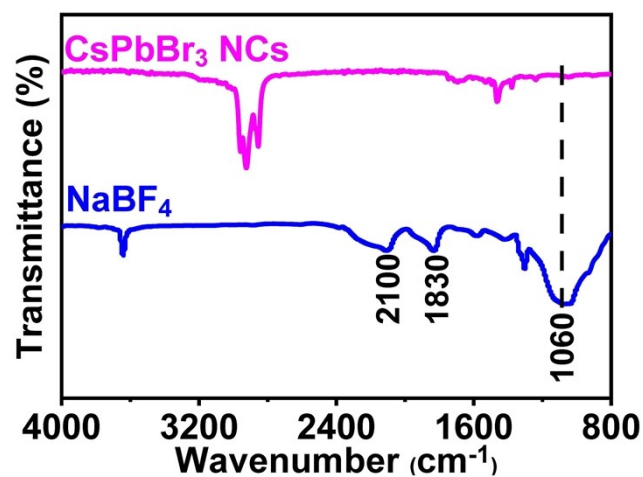

**Fig. S13** FT-IR spectra of  $\text{NaBF}_4$  and  $\text{CsPbBr}_3$  NCs prepared with the assistance of  $\text{NaBF}_4$ .

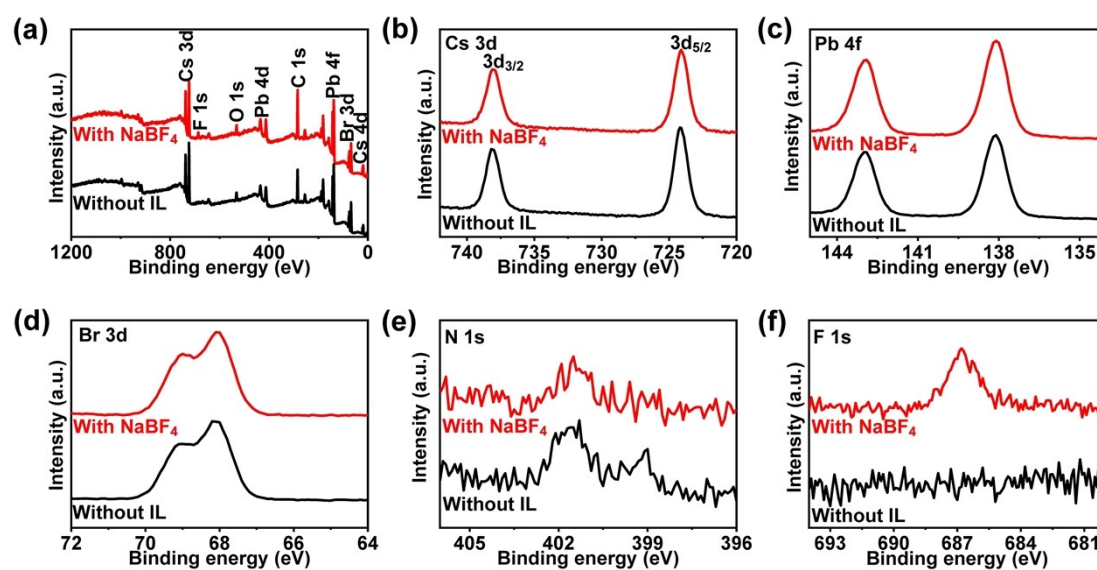

**Fig. S14** XPS (a) survey spectra, and (b) Cs 3d core-level, (c) Pb 4f core-level, (d) Br 3d core-level, (e) N 1s core-level, and (f) F 1s core-level spectra of  $\text{CsPbBr}_3$  NCs prepared with and without the assistance of  $\text{NaBF}_4$ .

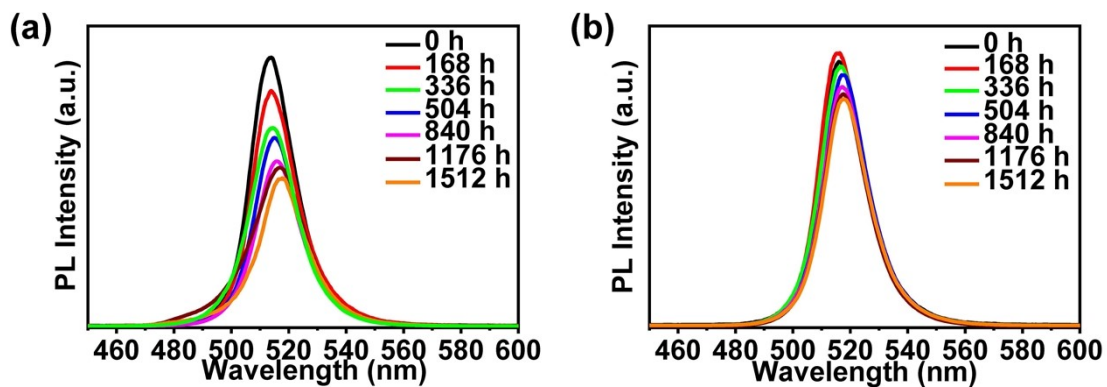

Fig. S15 PL spectra of CsPbBr<sub>3</sub> NCs prepared (a) without and (b) with the assistance of [Bmim]BF<sub>4</sub> in dependence with the storage time.

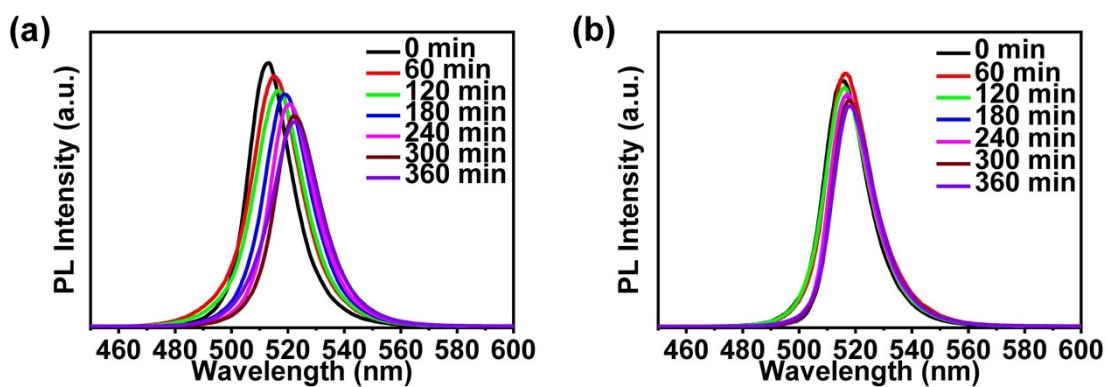

Fig. S16 PL spectra of CsPbBr<sub>3</sub> NCs prepared (a) without and (b) with the assistance of [Bmim]BF<sub>4</sub> in dependence with the irradiation time of UV light.

**Table S1** FWHM data and calculated average size of CsPbBr<sub>3</sub> NCs prepared with different  $n_{[\text{Bmim}]\text{BF}_4}/n_{\text{Pb}}$  ratios.

| $n_{[\text{Bmim}]\text{BF}_4}/n_{\text{Pb}}$ | Plane | FWHM/ $^\circ$ | Calculated Size <sup>a</sup> /nm | Intensity |
|----------------------------------------------|-------|----------------|----------------------------------|-----------|
| 0                                            | (200) | 0.806          | 10.11                            | 119       |
| 0.06                                         | (200) | 0.788          | 10.34                            | 135       |
| 0.12                                         | (200) | 0.727          | 11.21                            | 208       |
| 0.18                                         | (200) | 0.695          | 11.72                            | 243       |
| 0.24                                         | (200) | 0.580          | 14.05                            | 414       |

<sup>a</sup> Calculated size is obtained from Scherrer equation:  $D=K\lambda/B\cos\theta$ , where D represents the particle size of NCs, B represents the FWHM of (200) plane, and  $\theta$  represents the diffraction angle. K is equal to 0.89.

**Table S2** Fitting parameters of PL decay curves and calculated  $k_r$  and  $k_{nr}$  of CsPbBr<sub>3</sub> NCs with different  $n_{[\text{Bmim}]\text{BF}_4}/n_{\text{Pb}}$  ratios.

| $n_{[\text{Bmim}]\text{BF}_4}/n_{\text{Pb}}$ | $\tau_1/\text{ns}$ | $B_1/\%$ | $\tau_2/\text{ns}$ | $B_2/\%$ | $\chi^2$ | $\tau_{av}/\text{ns}$ | $k_r/\text{s}^{-1}$ | $k_{nr}/\text{s}^{-1}$ |
|----------------------------------------------|--------------------|----------|--------------------|----------|----------|-----------------------|---------------------|------------------------|
| 0                                            | 12.88              | 80.12    | 120.87             | 19.88    | 0.9965   | 88.43                 | $7.22\times 10^6$   | $4.09\times 10^6$      |
| 0.06                                         | 10.67              | 92.13    | 60.73              | 7.87     | 0.9845   | 27.05                 | $3.46\times 10^7$   | $2.38\times 10^5$      |
| 0.12                                         | 10.13              | 95.32    | 65.70              | 4.68     | 0.9850   | 23.55                 | $4.01\times 10^7$   | $2.32\times 10^5$      |
| 0.18                                         | 14.65              | 88.61    | 78.27              | 11.39    | 0.9946   | 40.55                 | $2.23\times 10^7$   | $2.39\times 10^5$      |

**Table S3** Fitting parameters of PL decay curves of CsPbBr<sub>3</sub> NCs prepared by using ionic liquid with different chain length.

| Sample                | $\tau_1/\text{ns}$ | $B_1/\%$ | $\tau_2/\text{ns}$ | $B_2/\%$ | $\chi^2$ | $\tau_{av}/\text{ns}$ |
|-----------------------|--------------------|----------|--------------------|----------|----------|-----------------------|
| Without IL            | 12.88              | 80.12    | 120.87             | 19.88    | 0.9965   | 88.43                 |
| [Mim]BF <sub>4</sub>  | 12.73              | 89.15    | 80.01              | 10.85    | 0.9952   | 41.89                 |
| [Emim]BF <sub>4</sub> | 12.55              | 92.41    | 85.73              | 7.59     | 0.9968   | 38.85                 |
| [Hmim]BF <sub>4</sub> | 11.69              | 94.49    | 75.72              | 5.51     | 0.9962   | 29.24                 |
| [Omim]BF <sub>4</sub> | 34.47              | 85.37    | 87.33              | 14.63    | 0.9840   | 50.47                 |

**Table S4** Storage, UV light, and water stability of perovskite NCs.

| Materials                                                | Storage                                                              | UV light                                                                                      | Water                                                                       | Ref       |
|----------------------------------------------------------|----------------------------------------------------------------------|-----------------------------------------------------------------------------------------------|-----------------------------------------------------------------------------|-----------|
| CsPbBr <sub>3</sub> @SiO <sub>2</sub> Janus NCs          | The NC film presents bright emission after storage in air for 4 days | The NC film shows slight drop (~2%) of PL intensity                                           | Maintaining 80% of PL intensity after being treated water for 7 days        | [66]      |
| Quasi-2D CsPbBr <sub>3</sub> NCs                         | –                                                                    | Keeping more than 85% of PL intensity after 120 min UV light irradiation                      | Remaining 87% of PL intensity after 168 h water treatment                   | [67]      |
| CsPbBr <sub>3</sub> /Pb-MA composite                     | –                                                                    | Maintaining 43% of initial PL intensity after 36 h UV light irradiation                       | Holding 83% of PL intensity after being immersed in water for 192 h         | [68]      |
| 4-Bromo-butyric acid passivated CsPbBr <sub>3</sub> NCs  | –                                                                    | –                                                                                             | Maintaining 79% of PL intensity after 72 h in aqueous solution              | [69]      |
| [Bmim]BF <sub>4</sub> passivated CsPbBr <sub>3</sub> NCs | Holding 85% of initial PL intensity after storage 1512 h             | Retaining ~90% of initial intensity after continuous irradiation under a UV light for 360 min | Reserving 67.5% of initial emission intensity after 21 days water treatment | This work |
